# Supplementary material
Source: PubMed Central journal article supplement (PMC6447106)
Supplement: tpmd170628.SD1.pdf [file tpmd170628.SD1.pdf]

## Supplementary Online Information

**Table S1** Raw Data employed for the analysis presented in Table 1. Positive = 1 indicates that a pool was positive.

### Figure S1

Caption: PCR for *Leishmania* spp. Infection in sand fly pools. For the PCR we used the following primers LITSR and L5.8S specific for the ITS-1 gene (300-350 bp). Well codes - M: Molecular weight ladder 100 bp (Promega); C +: *Leishmania panamensis* positive DNA control from a promastigote culture of reference strain MHOM / PA / 98 / WR 2306; 1 (*Lu. Gomezii*); 2 (*Lu. Trapidoi*); 3 (*Lu. Trapidoi*); 4 (*Lu. triramula*); 10 (*Lu. Panamensis*); 11 (*Lu. Trapidoi*); 12 (*Lu. Trapidoi*); 13 (*Lu. Trapidoi*); 14 (*Lu. Trapidoi*); 15 (*Lu. Trapidoi*); 16 (*Lu. Trapidoi*); 17 (*Lu. Trapidoi*); 19 (*Lu. Gomezii*); 21 (*Lu. Trapidoi*); 22 (*Lu. Trapidoi*); 23 (*Lu. Panamensis*); 25 and 26 negative control, i.e., without a DNA template.

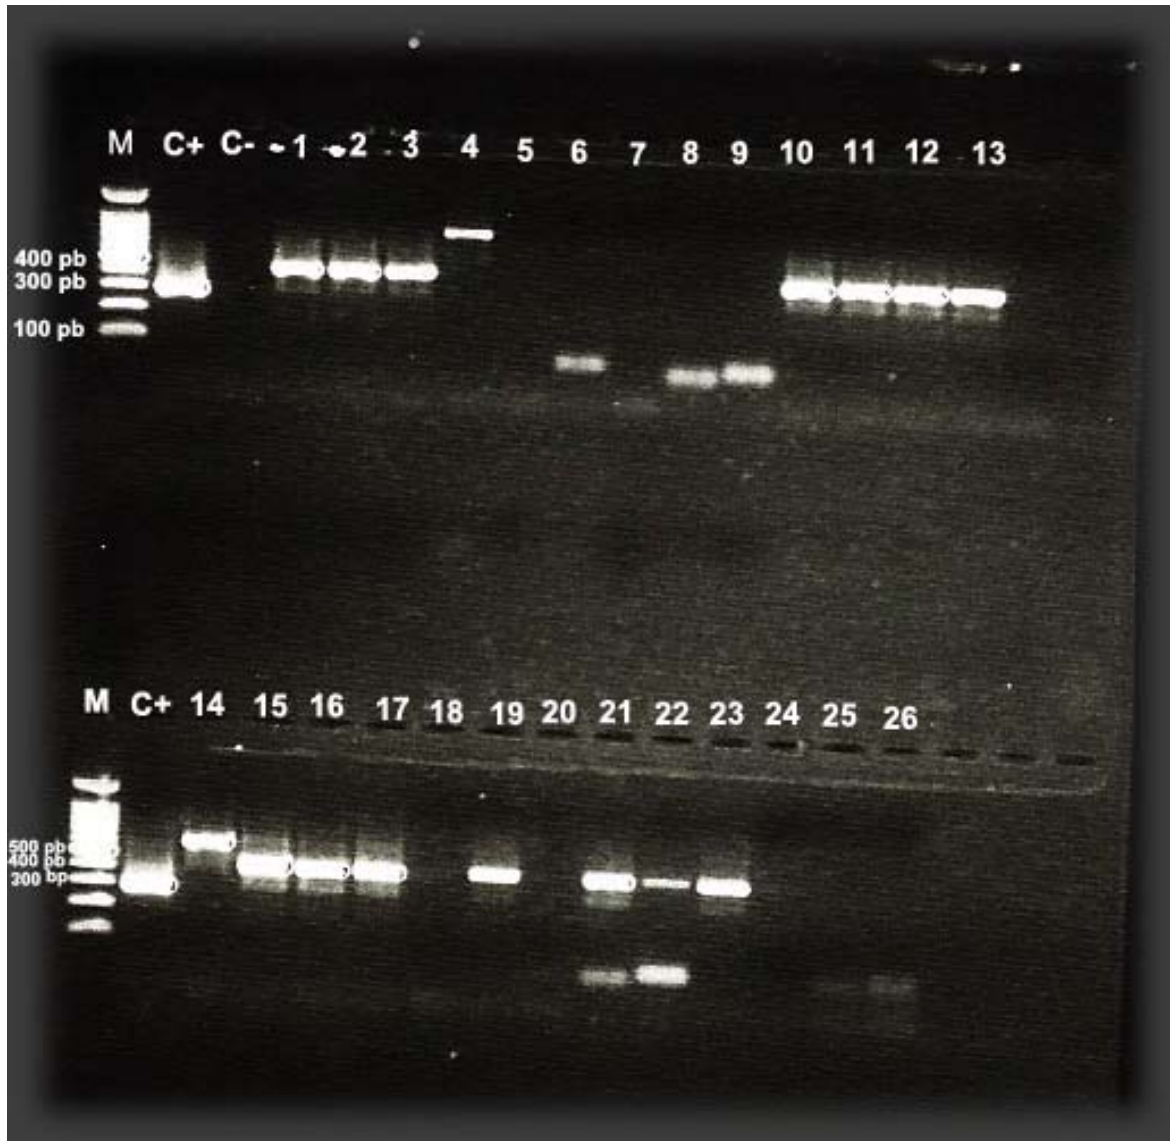

Note: Table S1 will be available online in final publication.
